# Supplementary material for: Germination and infectivity of microconidia in the rice blast fungus Magnaporthe oryzae
Source: PubMed Central journal article supplement — Nat Commun. 2014 Aug 1;5:4518. doi: 10.1038/ncomms5518 (PMC4143928; doi:10.1038/ncomms5518), 2014-08-01
Supplement: ncomms5518-s1.pdf [file ncomms5518-s1.pdf]

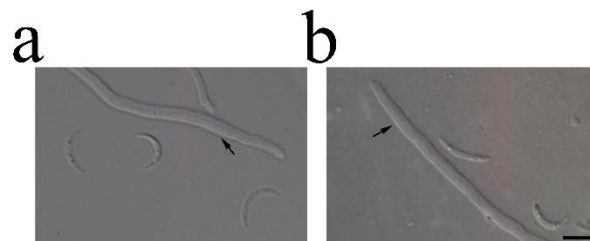

**Supplementary Figure 1.** Microconidia of 70-15 (*MAT1-1-1*) were not stimulated for germination or attracted to germ tubes or hyphae (marked with arrows) of Guy11 (*MAT1-1-2*) on 1% water agar (**a**) or oatmeal agar (**b**). Bar=5  $\mu$ m.

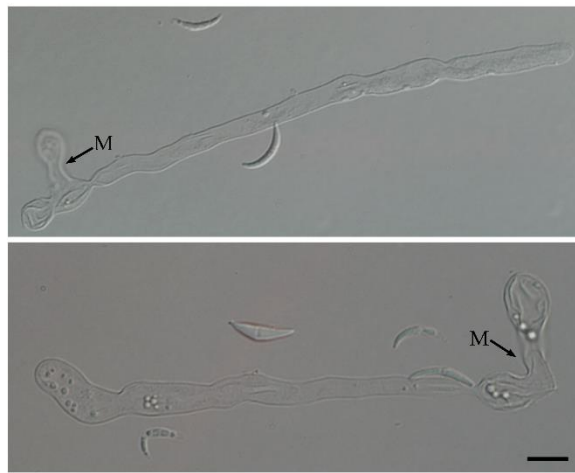

**Supplementary Figure 2.** Microconidia of the *Mgat1* deletion mutant germinated on 1% water agar for 96 h. Arrows pointed to the germination site. MI, microconidia; GT, Bar=5  $\mu$ m.

### GFP70 micronidia

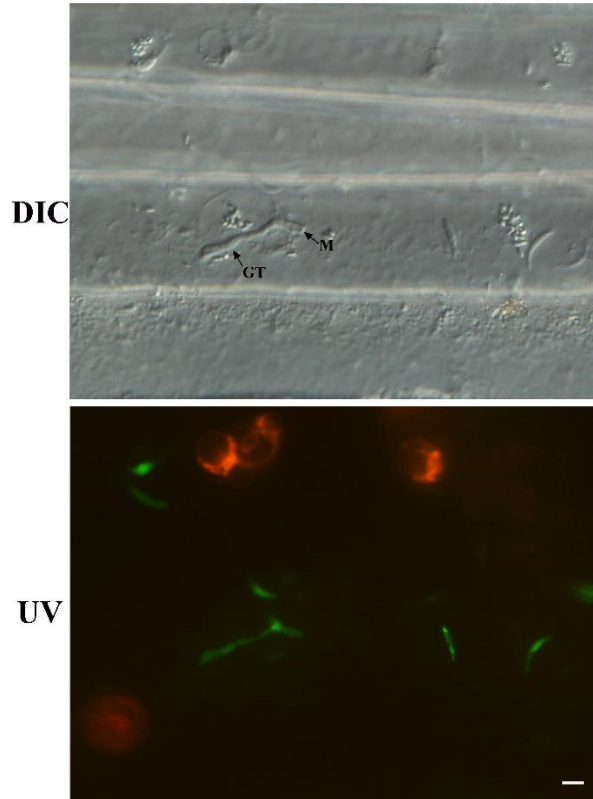

**Supplementary Figure 3.** Microconidium germination on plant surfaces. The barley epidermis inoculated with GFP70 microconidia was peeled off at 72 hpi and examined under DIC (upper) or epifluorescence (lower) microscopy. Bar=5  $\mu$ m. M, microconidium; GT, germ tube.

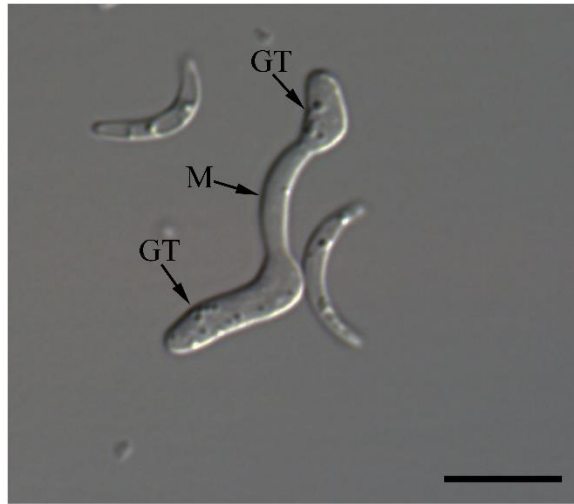

**Supplementary Figure 4.** Microconidia incubated on plastic coverslips for 72 h. Germination was rarely observed, and appressorium formation was not detected. M, microconidium; GT, germ tube. Bar=5  $\mu$ m.

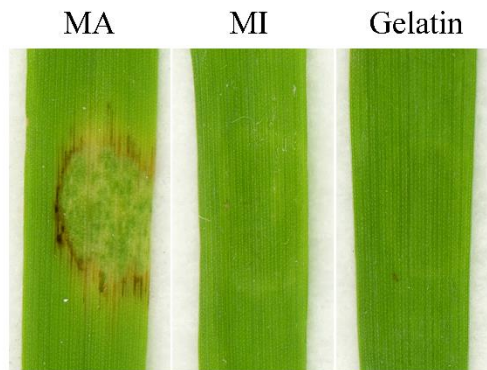

**Supplementary Figure 5.** Infection assays with intact barley leaves. Leaves of barley cultivar Golden Promise were drop-inoculated (lower) with macroconidia (MA) or microconidia (MI) of strain 70-15, or gelatin (as a control). Typical leaves were photographed 7 dpi.

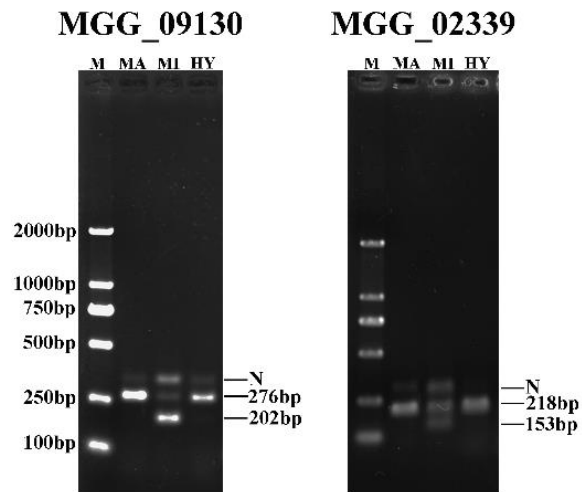

**Supplementary Figure 6.** Verification of two genes specifically expressed in microconidia by RT-PCR. PCR products of MGG\_09130 and MGG\_02339 were amplified from first strand cDNA synthesized with RNA isolated from macroconidia (MA), microconidia (MI), and vegetative hyphae (HY). M, the *DS*<sup>TM</sup> 2000 (Dongsheng, Guangzhou, China) MW marker lane. The 202-bp band for MGG\_09130 and the 153-bp band for MGG\_02339 were the expected bands amplified from cDNA of these two genes. The 276-bp and 218-bp bands were amplified from contaminating genomic DNA. N, non-specific band.

**Supplementary Table 1. Microconidium production in different liquid media.**

| Medium | Temperature (°C) | Microconidia * (x10 <sup>4</sup> /ml) |
|--------|------------------|---------------------------------------|
| PDB    | 15               | 54.3±12.1 <sup>B</sup>                |
|        | 20               | 418.3±221.1 <sup>A</sup>              |
|        | 25               | 3.2±2.9 <sup>C</sup>                  |
| 5xYEG  | 20               | 2.1±2.1 <sup>C</sup>                  |
| CM     | 20               | 0.0±0.0 <sup>C</sup>                  |

\* Data from three replicates were analyzed with Tamhane's T2 test. The same letter indicated that there was no significant difference. Different letters (A, B, C) were used to mark statistically significant difference (P = 0.05).

**Supplementary Table 2. Genes specifically expressed or up-regulated over 20-fold in microconidia.**

|                                                       | Gene ID   | Fold Change |       |
|-------------------------------------------------------|-----------|-------------|-------|
|                                                       |           | MI/HY       | MI/MA |
| Specifically expressed<br>in microconidia<br>(RPKM>2) | MGG_02645 | N/A*        | N/A   |
|                                                       | MGG_14895 | N/A         | N/A   |
|                                                       | MGG_10047 | N/A         | N/A   |
|                                                       | MGG_02339 | N/A         | N/A   |
|                                                       | MGG_13132 | N/A         | N/A   |
|                                                       | MGG_09130 | N/A         | N/A   |
|                                                       | MGG_08567 | N/A         | N/A   |
| Up-regulated (>20-<br>fold) in microconidia           | MGG_04554 | 29          | 270   |
|                                                       | MGG_14041 | 892         | 64    |
|                                                       | MGG_04358 | 116         | 39    |
|                                                       | MGG_15485 | 45          | 38    |
|                                                       | MGG_08046 | 50          | 23    |
|                                                       | MGG_05952 | 779         | 21    |

\* These genes were specifically expressed in microconidia.

MI/HY, microconidia vs. hyphae comparison.

MI/MA, microconidia vs. macroconidia comparison.

N/A, not assayed.



**Supplementary Table 3. *Magnaporthe oryzae* strains used in this study**

| <b>Strain</b> | <b>Genotype</b>                        | <b>Reference</b> |
|---------------|----------------------------------------|------------------|
| Guy11         | Wild type ( <i>MAT1-1-2</i> )          | 1                |
| 70-15         | Wild type ( <i>MAT1-1-1</i> )          | 1                |
| P34           | Wild type                              | 2                |
| Y131          | Wild type                              | 2                |
| GFP70         | A transformant of 70-15 expressing GFP | This study       |
| nn78          | $\Delta pmk1$ mutant                   | 3                |
| MK23          | $\Delta mst12$ mutant                  | 4                |
| MD1           | $\Delta Momcm1$ mutant                 | 5                |
| atg1          | $\Delta Mgatg1$ mutant                 | 6                |

## Supplementary References

- 1 Chao, C. C. T. & Ellingboe, A. H. Selection for mating competence in *Magnaporthe grisea* pathogenic to rice. *Can. J. Bot.* **69**, 2130-2134 (1991).
- 2 Xue, M. F. *et al.* Comparative analysis of the genomes of two field isolates of the rice blast fungus *Magnaporthe oryzae*. *PLoS Genet.* doi:10.1371/journal.pgen.1002869 (2012).
- 3 Xu, J. R. & Hamer, J. E. MAP kinase and cAMP signaling regulate infection structure formation and pathogenic growth in the rice blast fungus *Magnaporthe grisea*. *Genes Dev.* **10**, 2696-2706 (1996).
- 4 Park, G., Xue, G. Y., Zheng, L., Lam, S. & Xu, J. R. *MST12* regulates infectious growth but not appressorium formation in the rice blast fungus *Magnaporthe grisea*. *Mol. Plant-Microbe Interact.* **15**, 183-192 (2002).
- 5 Zhou, X. Y. *et al.* A MADS-box transcription factor MoMcm1 is required for male fertility, microconidium production and virulence in *Magnaporthe oryzae*. *Mol. Microbiol.* **80**, 33-53 (2011).
- 6 Liu, X. H. *et al.* Involvement of a *Magnaporthe grisea* serine/threonine kinase gene, *MgATG1*, in appressorium turgor and pathogenesis. *Eukaryot. Cell* **6**, 997-1005 (2007).
